# Supplementary material for: Home sick: impacts of migratory beekeeping on honey bee ( Apis mellifera ) pests, pathogens, and colony size
Source: PeerJ journal article supplement (doi:10.7717/peerj.5812), 2018-11-02
Supplement: Supplemental_Data_S1.pdf [file Supplemental_Data_S1.pdf]

GGACGGACAGTCATTAAAGCCACCTGGAACATCAGGTAAGCGATGGTTGTT  
TGACATTGAGCTACAAGACTCGGGATGTTATCTCTTGCGTGGAAATGCCGCCG  
AACTGAGATTCAATTATCAACGACACAGTTAATGAGGAAAACCATGTACGC  
CATGCCTGGCGATTACACAACAAGAAAGCAATACTCCCAATGTACACAACACG  
GAACTCGCTTCGTCAACTAGTGAAAACCTCGGTTGAGACCCAAGAAATCACAA  
CCTTTCATGATGTGGAAACTCCAAATAGGATCGATACCCCATGGCTCAGGA  
TACTTCATCGGCTAGGAACATGGATGATACGCACAGTATTATTTCAGCTTCCCT  
GCTCGTGCCGATAGTATTCTTGCGGTGTCTCTTTGCCGATCAACGATCGTGTA  
CTTGTGGTTACCTTCGATTCTAAAAGATAACTCAATAAACCAAACATGTGT  
GACGAAGAAGTTGCTGCACTCGTAGTTGACAATGGCGTCCACCTGTTTAGAG  
CGAATTCGGAAACATTTACTATAGTTCAGGTCGGAATAATCTCGATATAGCC  
ACTTCACCTCCTTCCATCAATCGCTACTATGCGGTAGGTGCGGGAGATGATAT  
GGACTTTCCATCTTTATCGGTACGCCATGAGCGCCA
